# Supplementary material
Source: publisher figshare collection journal article supplement (https://rs.figshare.com/ndownloader/files/14661737)
Supplement: Supplementary file 1 [file 14661737]

| Table 1: Distribution of CRISPR, *cas* and anti-CRISPR in the representative bacterial genomes (n=5677) | | | | |
| --- | --- | --- | --- | --- |
| **CRISPR array** | **Cas gene** | **Anti-CRISPR** | **Number of genomes** | **Proportion of genomes** |
| **+** | **+** | **-** | **2238** | **0.394** |
| **+** | **+** | **+** | **92** | **0.016** |
| **+** | **-** | **-** | **98** | **0.017** |
| **+** | **-** | **+** | **1** | **0.0001** |
| **-** | **+** | **-** | **442** | **0.0778** |
| **-** | **+** | **+** | **7** | **0.0012** |
| **-** | **-** | **+** | **40** | **0.007** |
| **-** | **-** | **-** | **2759** | **0.485** |
|  |  |  |  |  |
| Table 2: Distribution of CRISPR, *cas* and anti-CRISPR in the bacterial genomes (n=104947) | | | | |
|  |  |  |  |  |
| **CRISPR array** | **Cas gene** | **Anti-CRISPR** | **Number of genomes** | **Proportion of genomes** |
| **+** | **+** | **-** | **34503** | **0.328** |
| **+** | **+** | **+** | **1066** | **0.010** |
| **+** | **-** | **-** | **1723** | **0.016** |
| **+** | **-** | **+** | **167** | **0.001** |
| **-** | **+** | **-** | **7669** | **0.073** |
| **-** | **+** | **+** | **64** | **0.0006** |
| **-** | **-** | **+** | **795** | **0.007** |
| **-** | **-** | **-** | **58960** | **0.561** |
